# Supplementary material for: Dye-tracer-aided investigation of xylem water transport velocity distributions
Source: Copernicus journal article supplement (doi:10.5194/hess-27-3393-2023), 2023-09-22
Supplement: Supplementary file 1 [file hess-27-3393-2023-supplement.zip]

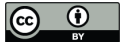

## *Supplement of*

# **Dye-tracer-aided investigation of xylem water transport velocity distributions**

**Stefan Seeger and Markus Weiler**

*Correspondence to:* Stefan Seeger ([stefan.seeger@uni-goettingen.de](mailto:stefan.seeger@uni-goettingen.de))

- [hess-27-3393-2023-supplement-title-page.pdf](#)
- [imageAnalysis\\_supplement](#)
  - [config.r](#)
  - [images](#)
    - \* [01\\_photos](#)
    - \* [02\\_masks](#)
    - \* [03\\_NDBI](#)
    - \* [04\\_distances](#)
    - \* [05\\_results](#)
    - \* [originalPhoto.jpg](#)
  - [salix1\\_measurements.csv](#)
  - [step0\\_preparation.txt](#)
  - [step1\\_computeNDBI.r](#)
  - [step2\\_computeDistances.r](#)
  - [step3\\_classify.r](#)
  - [step4\\_computeVelocities.r](#)

The copyright of individual parts of the supplement might differ from the article licence.
